# Supplementary material for: Identification of a Five Immune Term Signature for Prognosis and Therapy Options (Immunotherapy versus Targeted Therapy) for Patients with Hepatocellular Carcinoma
Source: Hindawi journal article supplement (doi:10.1155/2023/8958962), 2023-01-01

**Figure S1. The prediction accuracy of characteristic genes on risk group in validation cohort**

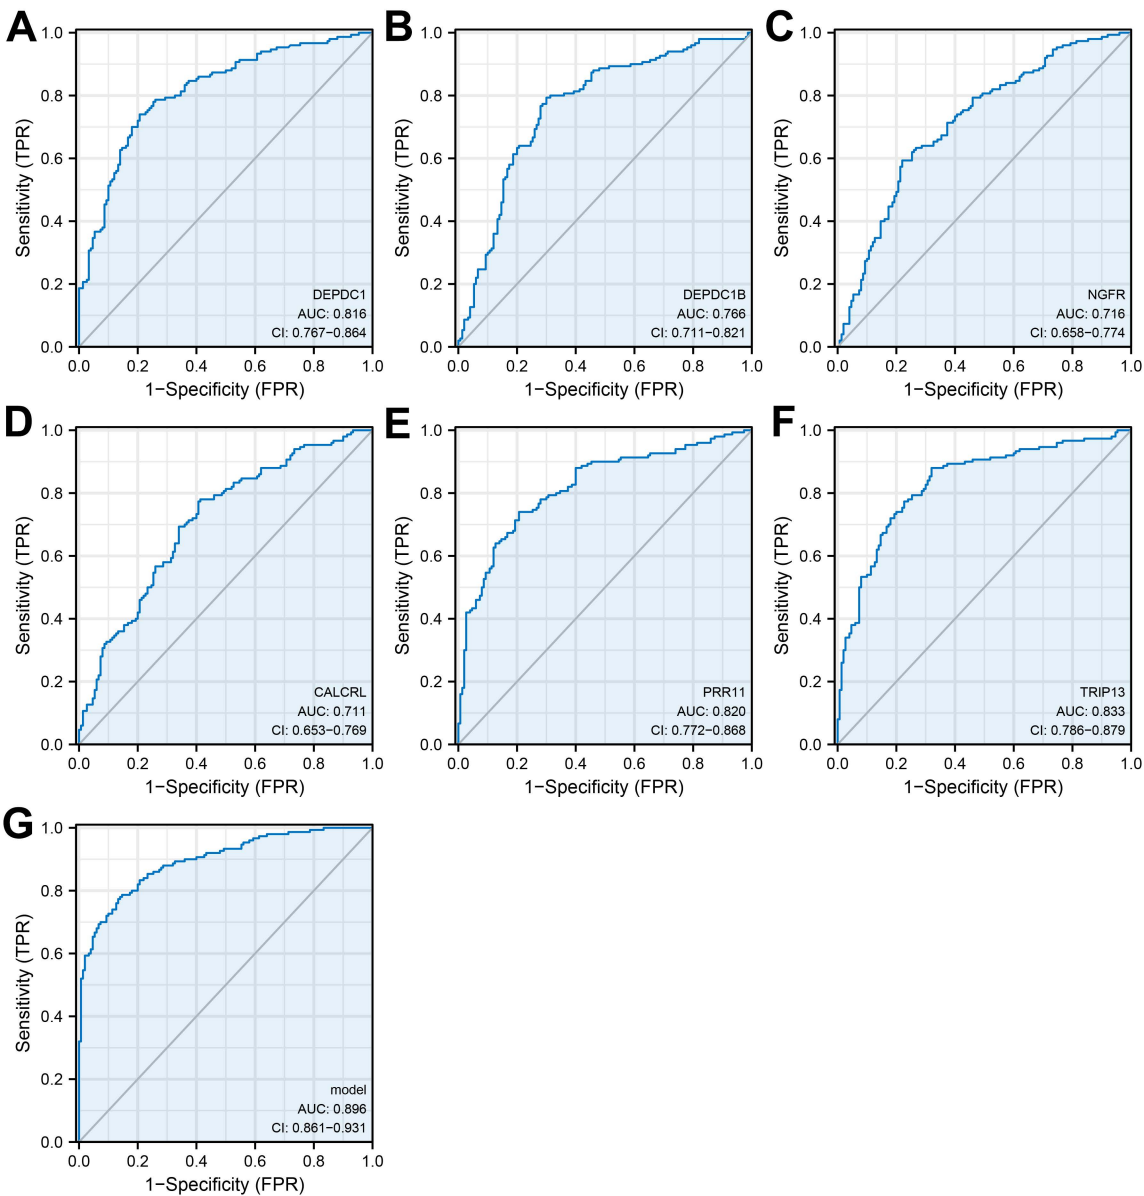

Supplement: f1 [file 8958962.f1.pdf]
