# Supplementary material for: Identification of a Five Immune Term Signature for Prognosis and Therapy Options (Immunotherapy versus Targeted Therapy) for Patients with Hepatocellular Carcinoma
Source: Hindawi journal article supplement (doi:10.1155/2023/8958962), 2023-01-01

**Figure S2. Western blot of CALCRL**

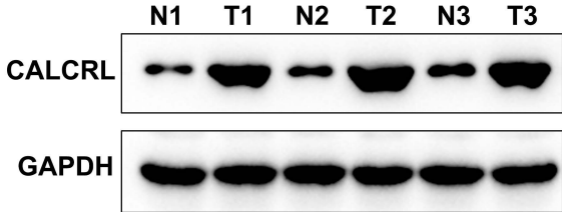

Supplement: f2 [file 8958962.f2.pdf]
